# Supplementary material
Source: PubMed Central journal article supplement (PMC3643996)
Supplement: NIHMS439949-supplement-2.pdf [file NIHMS439949-supplement-2.pdf]

Figure S1

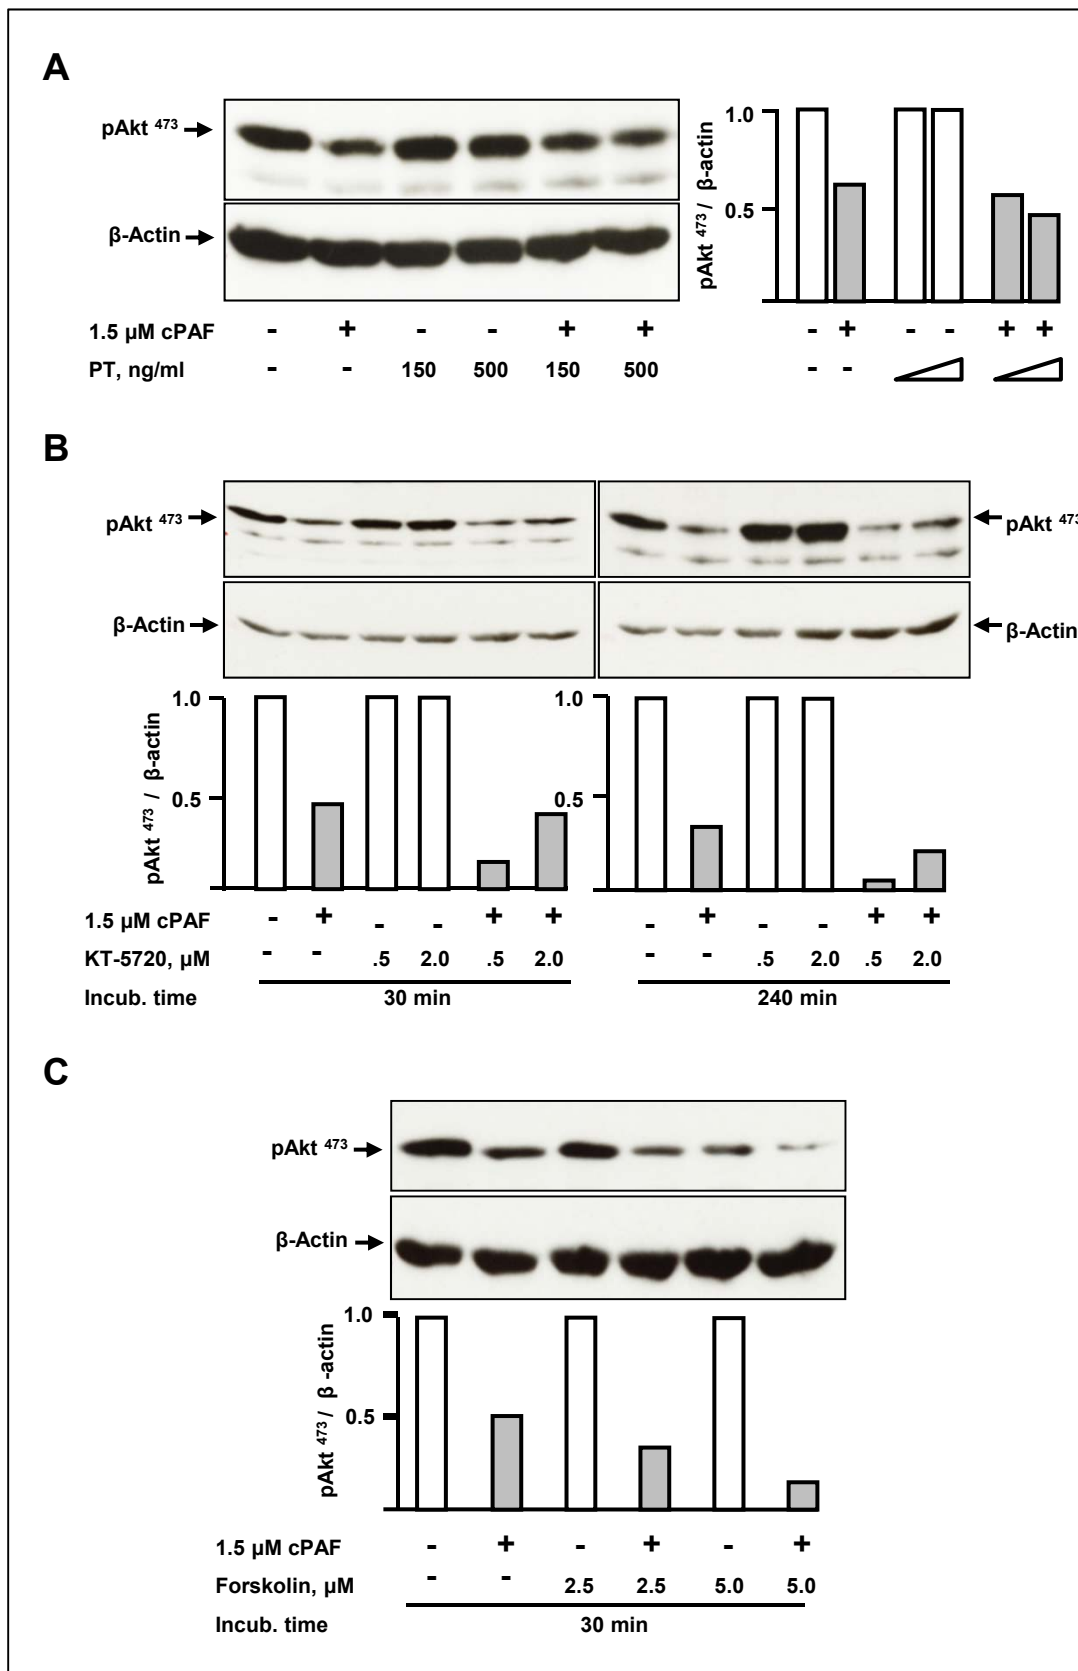

**Figure S1. cPAF-induced de-phosphorylation of pAKT<sup>473</sup> does not require G $\alpha_i$ / G $\alpha_o$  or PKA**

**A.** HT-29 cells were starved overnight in the absence and presence of pertussis toxin (PT), in serum-free medium. We then stimulated the cells with cPAF for 30 min and determined pAkt<sup>473</sup> and  $\beta$ -actin levels using immunoblot analyses.

**B & C.** We pre-incubated starved HT-29 cells with the PKA inhibitor KT520 (**B**) or the PKA activator forskolin (**C**) for 60 min at 37°C. The cells then were treated with cPAF or vehicle for 30 and 240 min (**B**) or for 30 min (**C**), and the levels of pAkt<sup>473</sup> and  $\beta$ -actin were assessed using immunoblot analyses, as described in *Materials and Methods*.
