# Supplementary material
Source: PubMed Central journal article supplement (PMC3643996)
Supplement: NIHMS439949-supplement-3.pdf [file NIHMS439949-supplement-3.pdf]

Figure S2

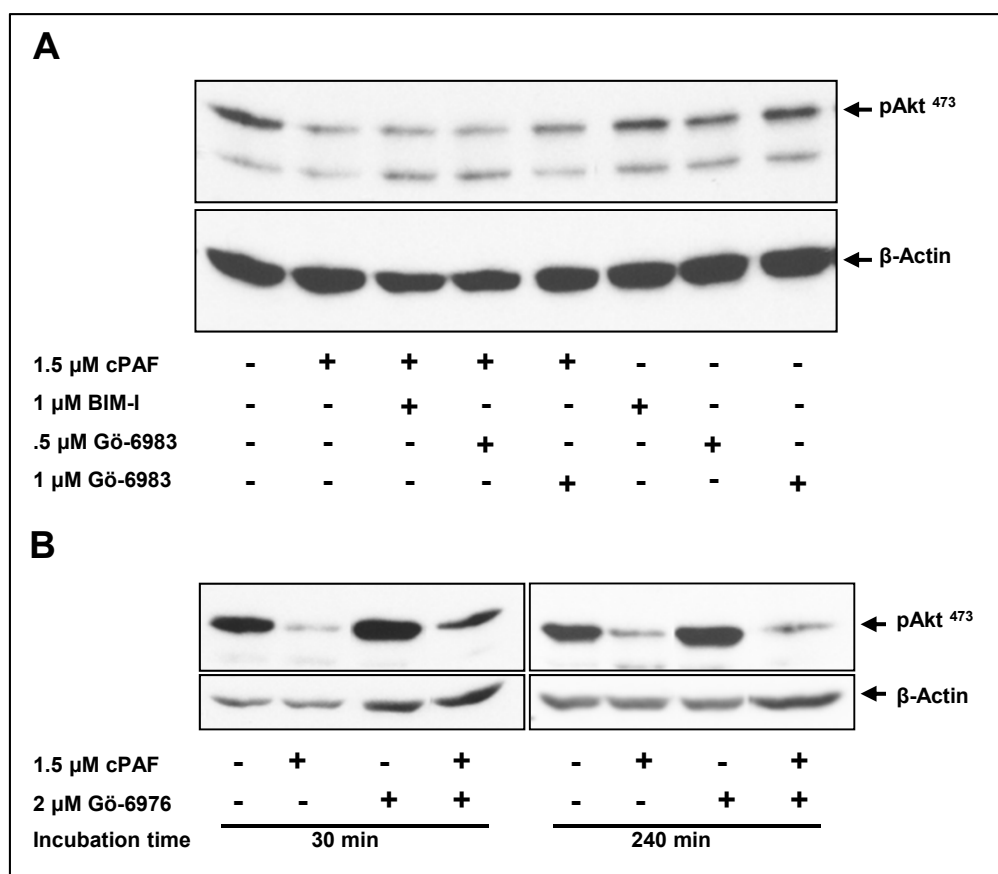

**Figure S2. PKC inhibition does not affect cPAF-induced dephosphorylation of pAkt<sup>473</sup>**

**A.** Starved HT-29 cells were pre-treated with vehicle or with the inhibitors bisindolylmaleimide-I hydrochloride (BIM-I) or Gö-6983, for 2 h at 37°C. We then treated the cells with cPAF or vehicle for 45 min. The levels of pAkt<sup>473</sup> and  $\beta$ -actin were assessed in cell lysates, using immunoblot analyses.

**B.** Starved HT-29 cells were pre-treated with vehicle or with the PKC inhibitor Gö-6976, for 60 min at 37°C. We then treated the cells with cPAF or vehicle for 30 min and 240 min. The levels of pAKT<sup>473</sup> and  $\beta$ -actin were assessed in cell lysates, using immunoblot analyses.
