# Supplementary material
Source: PubMed Central journal article supplement (PMC3643996)
Supplement: NIHMS439949-supplement-4.pdf [file NIHMS439949-supplement-4.pdf]

Figure S3

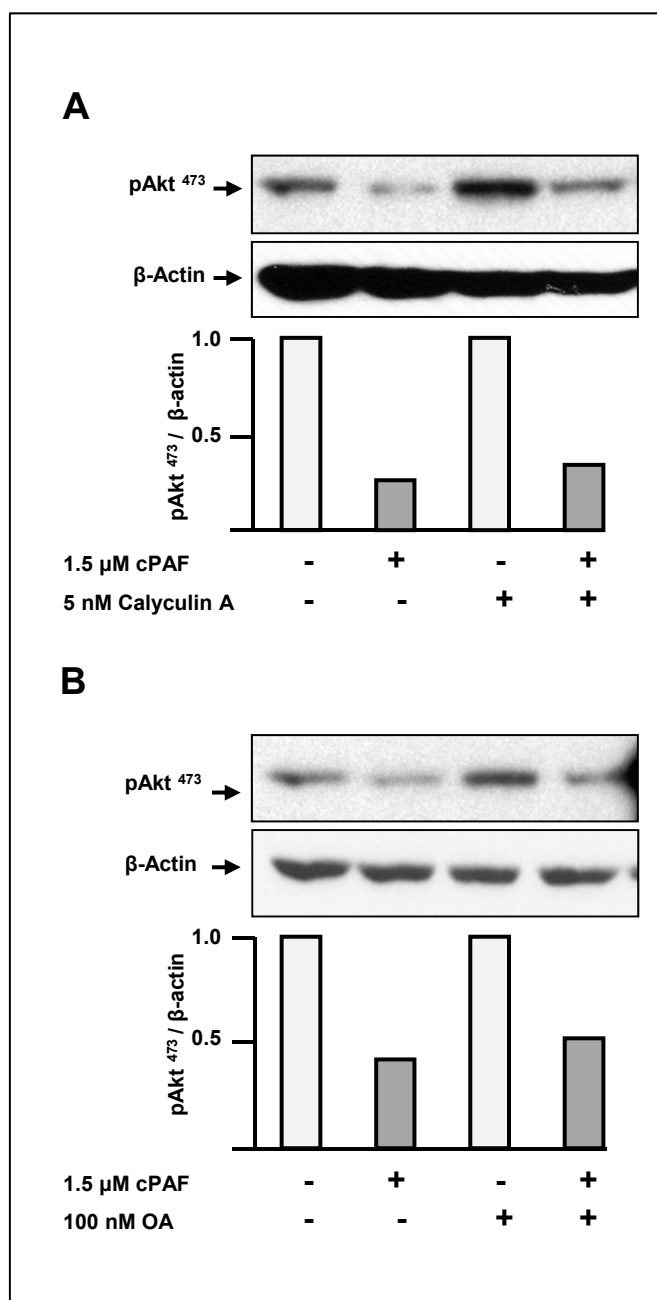

**Figure S3. Inhibitors of protein phosphatases PP1 and PP2 do not rescue cPAF-induced de-phosphorylation of pAkt<sup>473</sup>**

Starved HT-29 cells were pre-treated with vehicle or with the PP1 and PP2 inhibitors calyculin A (**A**, 10 min) or okadaic acid (OA, **B**, 15 min) at 37°C. We then treated the cells with cPAF or vehicle for 30 min. The levels of pAKT<sup>473</sup> and  $\beta$ -actin were assessed in cell lysates, using immunoblot analyses.
